# Supplementary material
Source: PubMed Central journal article supplement (PMC3113251)
Supplement: mmc1.pdf [file mmc1.pdf]

**The American Journal of Human Genetics Volume 88**

**Supplemental Data**

**Loss of BRCC3 Deubiquitinating Enzyme**

**Leads to Abnormal Angiogenesis**

**and Is Associated with Syndromic Moyamoya**

**Snaigune Miskinyte, Matthew G. Butler, Dominique Hervé, Catherine Sarret, Marc Nicolino, Jacob D. Petralia, Françoise Bergametti, Minh Arnould, Van N. Pham, Aniket V. Gore, Konstantinos Spengos, Steven Gazal, France Woimant, Gary K. Steinberg, Brant M. Weinstein, and Elisabeth Tournier-Lasserre**

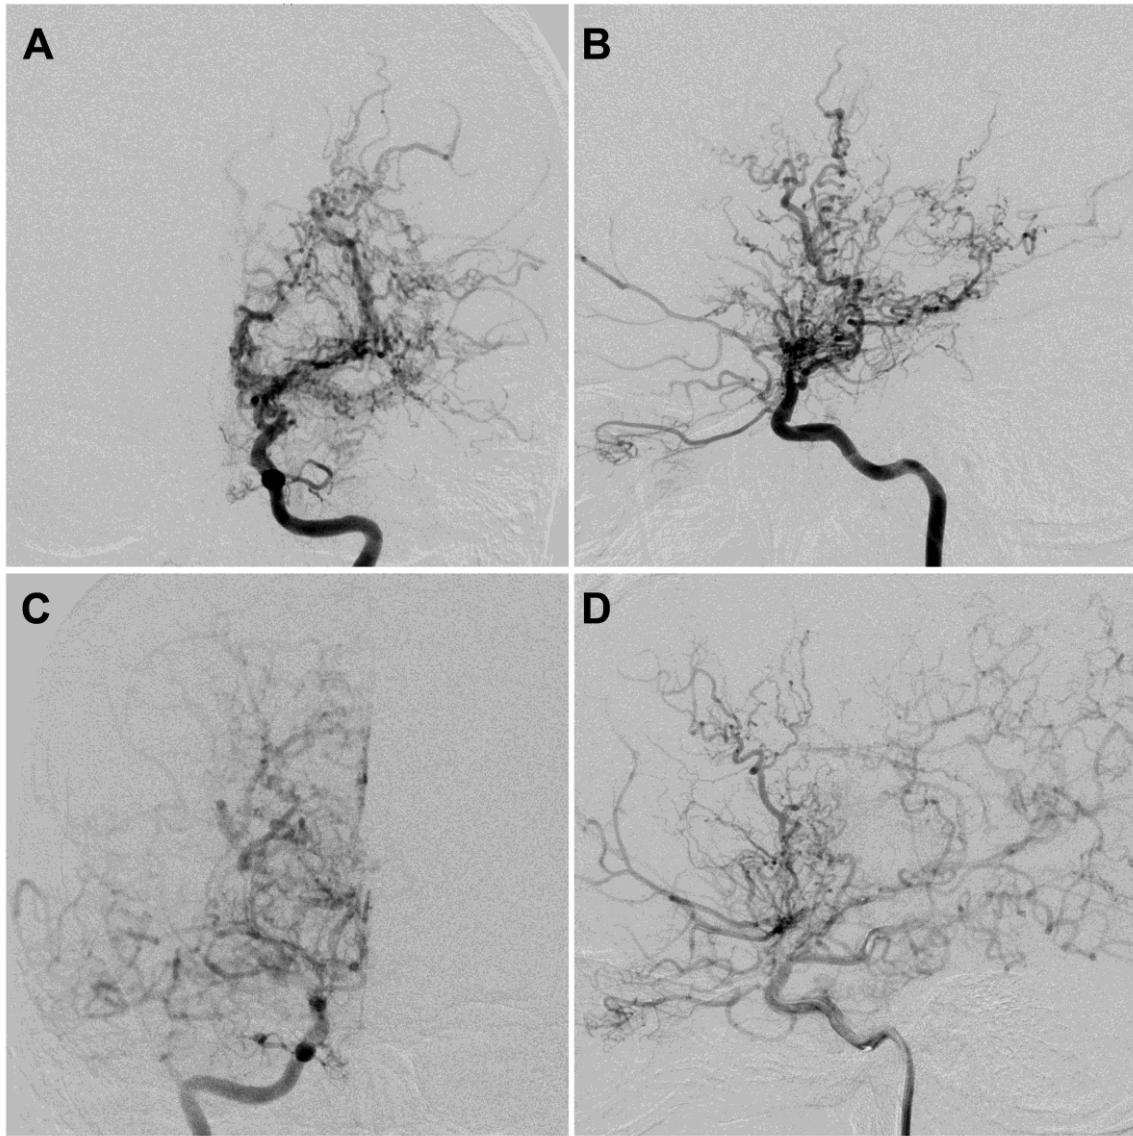

**Figure S1: Moyamoya angiopathy in F3 III-7, aged 18 yo.** AP/lateral left internal carotid artery (ICA) injections (A/B) and AP/ lateral right ICA injections (C/D) showing bilateral supraclinoid ICA occlusions and extensive Moyamoya collaterals.

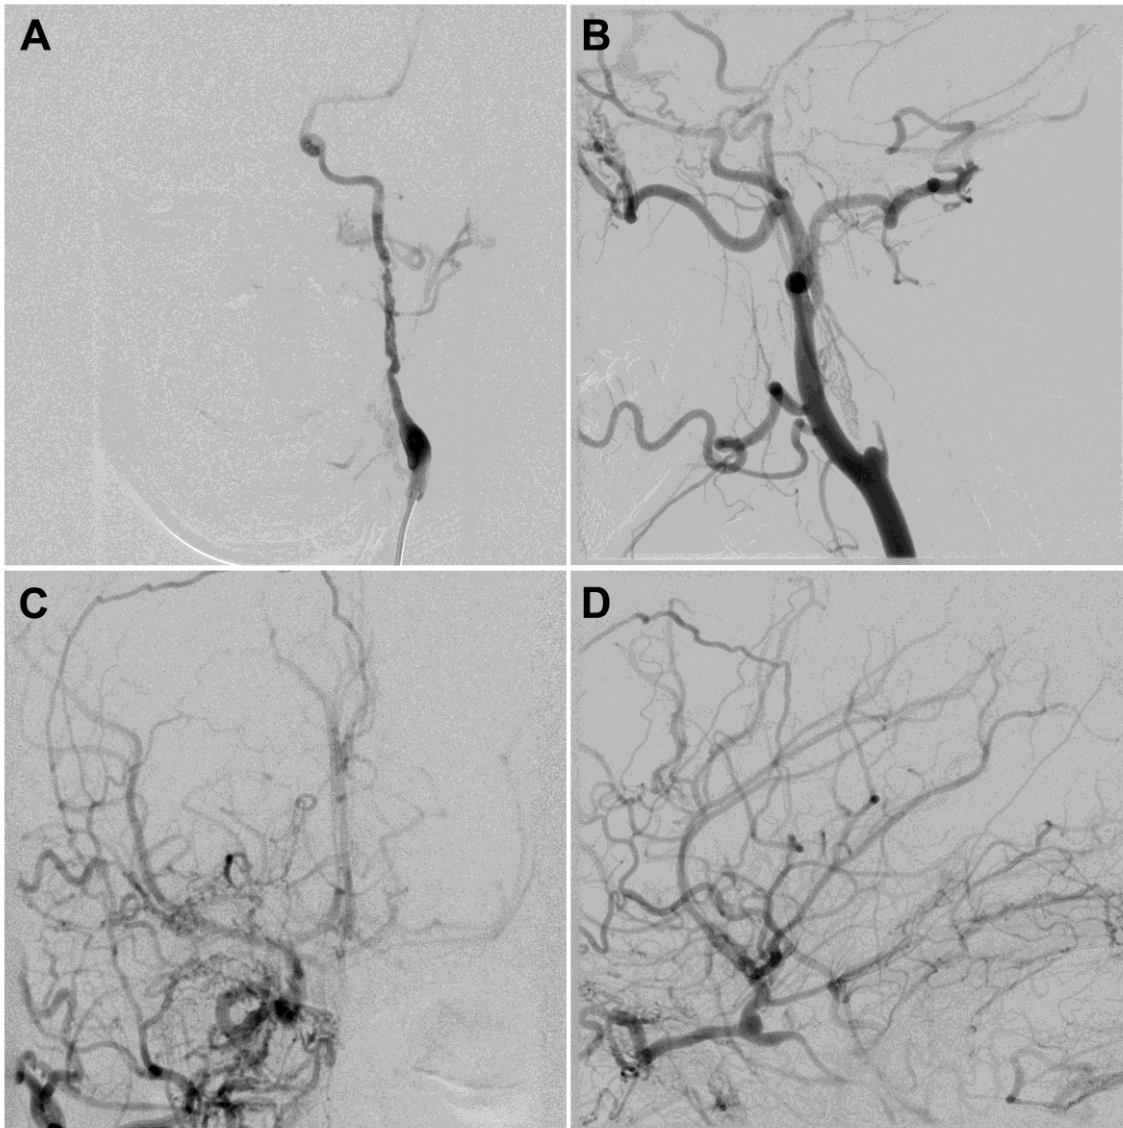

**Figure S2: Cerebral angiography in F3 III-2, aged 21 yo.** AP left internal carotid artery (ICA) injection (A) showing multiple areas of irregularity and narrowing suggesting prior occlusion with partial recanalization and occlusion of the left A1 anterior cerebral artery. Right ICA injection demonstrates occlusion of the cervical ICA (lateral, B) with reconstitution of the right cavernous ICA through multiple collaterals including moyamoya vessels (AP, C; lateral, D).

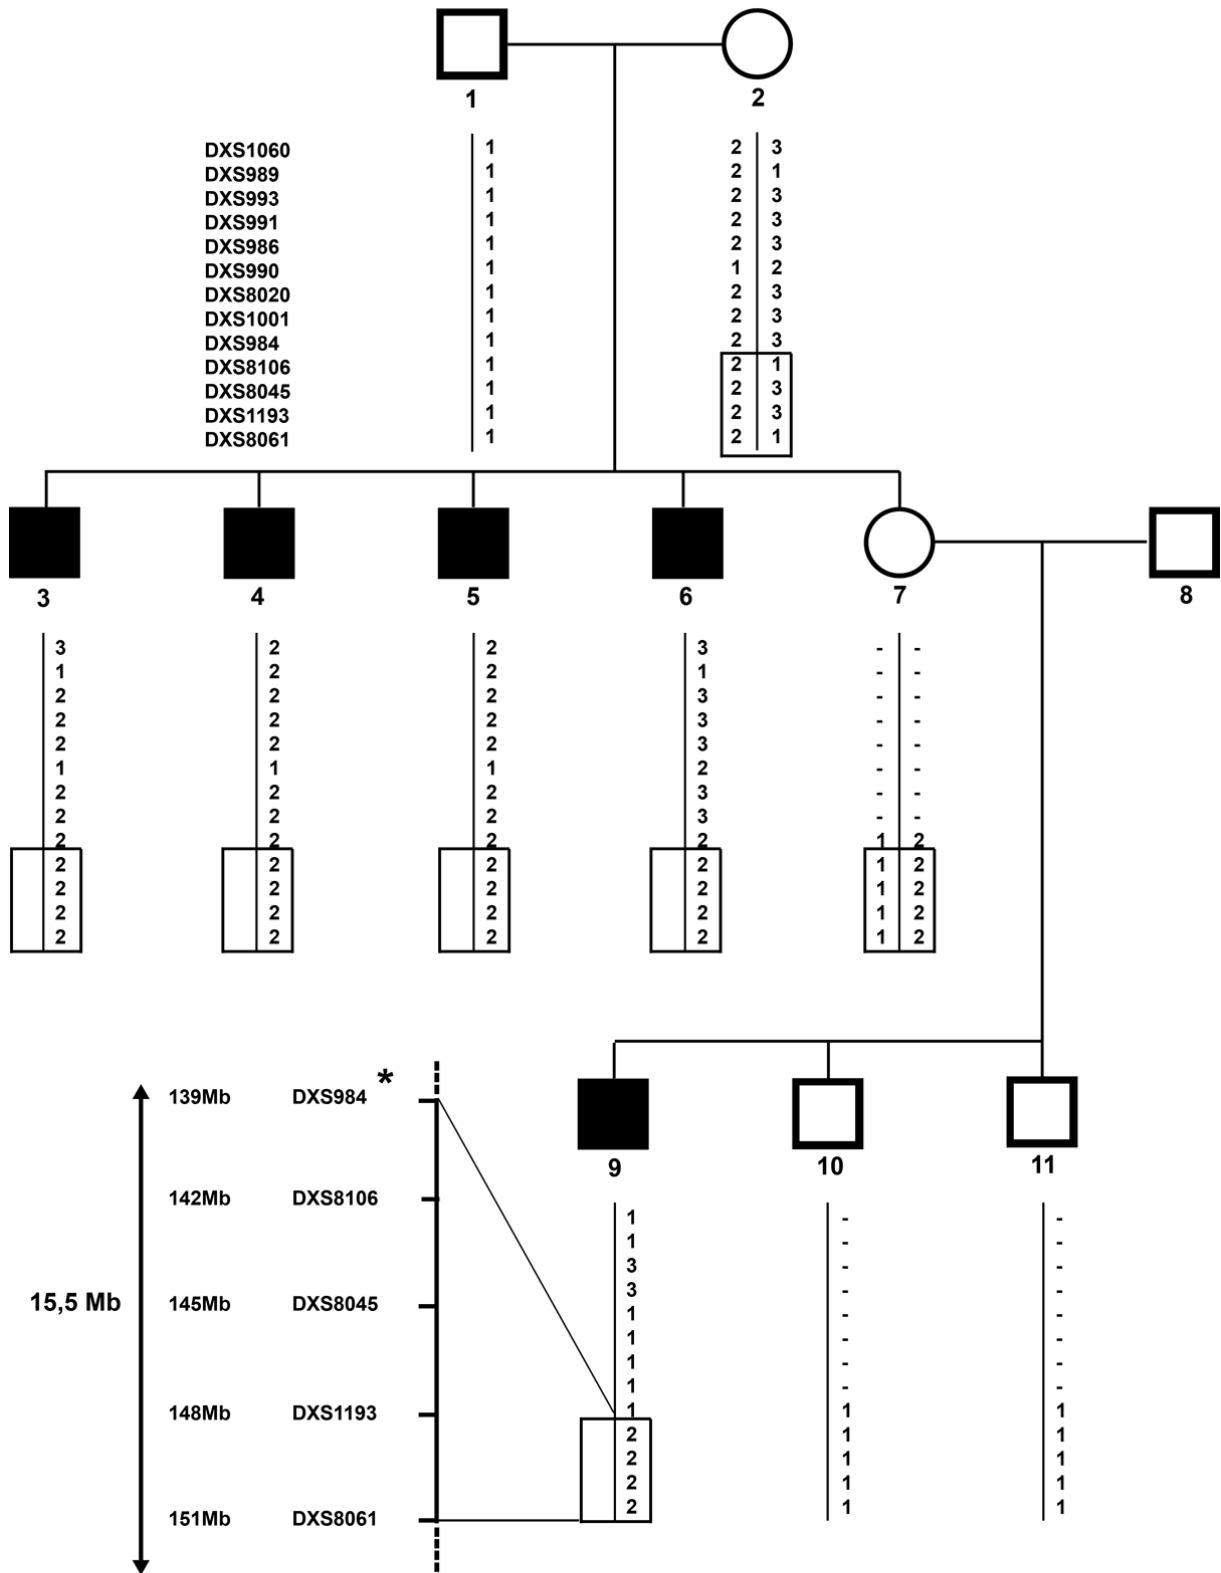

**Figure S3: X chromosome haplotype analysis in family F1.** Informative microsatellite markers and the haplotype cosegregating with the disease are shown.

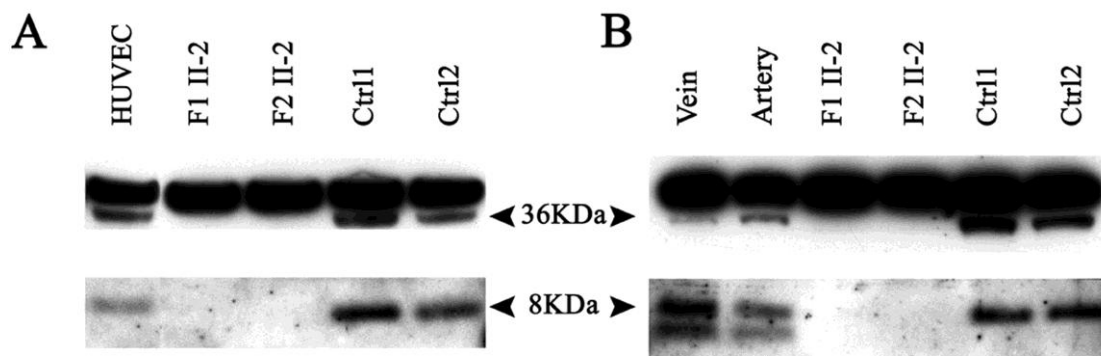

**Figure S4 : Western blot analysis of p8<sup>MTCp1NB</sup> and BRCC3 proteins.** **A:** BRCC3 (36 KDa) and p8<sup>MTCp1NB</sup> (8 KDa) proteins are not detected in EBV cell lines lysates from patients F1 II-2 and F2 II-2 while they are readily detectable in control EBV cell lysates and HUVEC endothelial cells. **B:** BRCC3 and p8<sup>MTCp1NB</sup> proteins are detected in both human arteries and veins (arteries > veins).

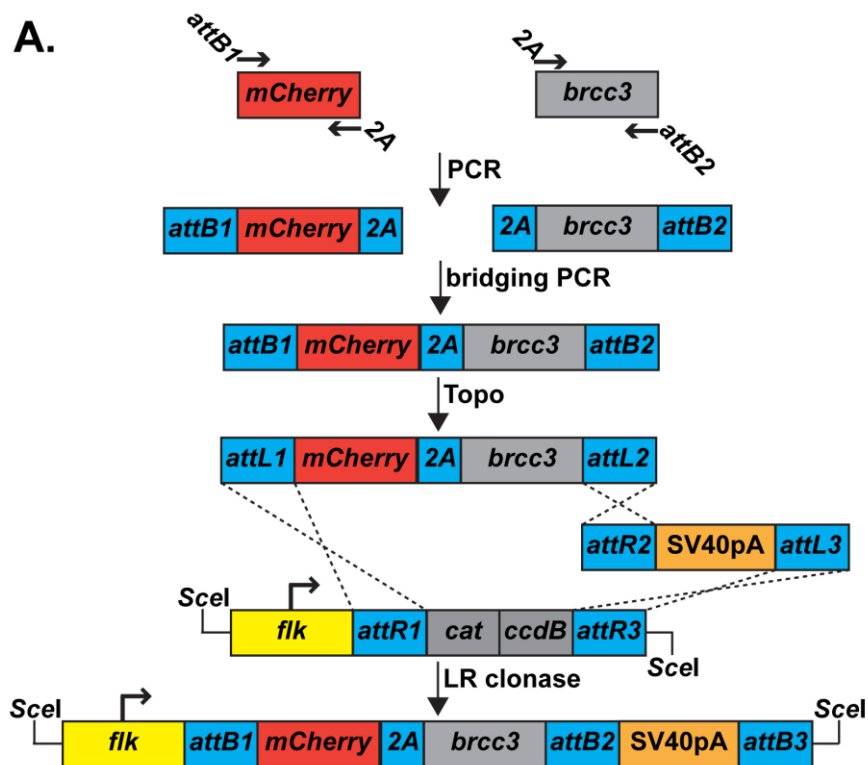

**B.**

| Name                   | Oligo (5'→3')                                                                                        |
|------------------------|------------------------------------------------------------------------------------------------------|
| <i>2A-brcc3-F</i>      | GGAAGCGGAGCTACTAATTCAGCCTGCTGAAGCAGGCTGGAGACGTGGA<br>GGAGAACCCTGGACCTATGGCTGTCAACGGGTGCATTAGAGTCGGAC |
| <i>attB2-brcc3-R</i>   | GGGGACCACCTTTGTACAAGAAAGCTGGGTTTACAATGCCCCAGCTCTTGGCTCAGC                                            |
| <i>attB1-mcherry-F</i> | GGGGACAAGTTTGTACAAAAAAGCAGGCTACATGGTGAGCAAGGGCGAGGAG                                                 |
| <i>2A-mcherry-R</i>    | AGGTCCAGGGTTCTCCTCCACGCTCCAGCCTGCCTTCAGCAGGC<br>TGAAGTTAGTAGCTCCGCTTCCCTTGTACAGCTCGTCCATGCC          |

**Figure S5 : *brcc3* Endothelial Expression Transgene.** (A) The strategy employed to generate an endothelial *brcc3* expression transgene is shown. A red fluorescent *mCherry* cassette (red) was PCR-amplified with primers containing *attB1* and 2A peptide (blue) sequences<sup>38,39</sup>. The *brcc3* (gray) coding sequence was PCR-amplified with primers containing 2A peptide and *attB2* sequences. A bridging PCR generated an *attB1*-*mCherry*-2A-*attB2* cassette, which was cloned into the pENTR/D-TOPO<sup>®</sup> vector (Invitrogen<sup>™</sup>). The resultant vector was recombined with pDEST-I-*SceI*-*flk* (unpublished, A.V. Gore) and p3E-*polyA* to generate a *SceI*-*flk1*-*mCherry*-2A-*brcc3*-SV40*polyA*-*SceI* transgene in a LR clonase reaction.<sup>40</sup> (B) Table lists the names and nucleotide sequences for the primers used in the construction of the *flk*-*mCherry*-2A-*brcc3* transgene.

**A.**

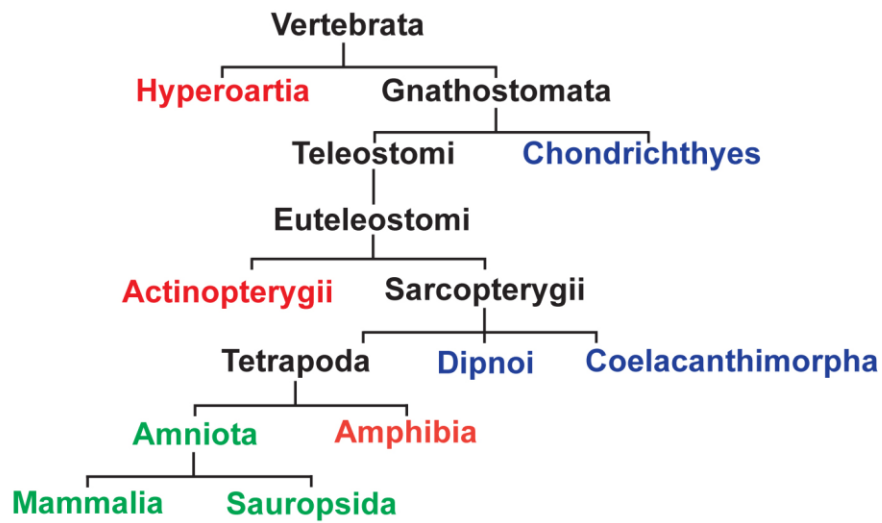

**B.**

| Hyperoartia               | Actinopterygii                | Amphibia                  | Mammalia                        | Sauropsida                 |
|---------------------------|-------------------------------|---------------------------|---------------------------------|----------------------------|
| <i>Petromyzon marinus</i> | <i>Danio rerio</i>            | <i>Xenopus laevis</i>     | <i>Ailuropoda melanoleuca</i>   | <i>Anolis carolinensis</i> |
|                           | <i>Gasterosteus aculeatus</i> | <i>Xenopus tropicalis</i> | <i>Bos Taurus</i>               | <i>Gallus gallus</i>       |
|                           | <i>Oryzias latipes</i>        |                           | <i>Callithrix jacchus</i>       | <i>Taeniopygia guttata</i> |
|                           | <i>Takifugu rubripes</i>      |                           | <i>Equus caballus</i>           |                            |
|                           | <i>Tetraodon nigrovirdis</i>  |                           | <i>Canis familiaris</i>         |                            |
|                           |                               |                           | <i>Homo sapiens</i>             |                            |
|                           |                               |                           | <i>Monodelphis domestica</i>    |                            |
|                           |                               |                           | <i>Mus musculus</i>             |                            |
|                           |                               |                           | <i>Ornithorhynchus anatinus</i> |                            |
|                           |                               |                           | <i>Otolemur garnettii</i>       |                            |
|                           |                               |                           | <i>Rattus norvegicus</i>        |                            |

**Figure S6 : Phylogeny of the *MTCPI* locus.** (A) A phylogenetic tree showing the presence (green) or absence (red) of *MTCPI* homologs at various stages of vertebrate evolution. *MTCPI* likely arose during tetrapod evolution given its presence in each of the mammalian and sauropsid species surveyed and its absence in amphibians as well as all of the more divergent relatives. (B) Table listing each of the species surveyed for the presence or absence of *MTCPI*.

| Primer name                           | Primer sequence 5' - 3'                                    | Product size (bp) | Position within the gene               |
|---------------------------------------|------------------------------------------------------------|-------------------|----------------------------------------|
| ECD21916                              | F : CAGAAATCAGATCATGTTGAGAGG<br>R : TTCACTGAGCAGAAAAAGAAGC | 236               | F8 coagulation factor VIII, intron 1   |
| ECD17738                              | F : GCAGTGGATCAGATGTCAATGT<br>R : TCAGTACCTGGAGGCGAGTT     | 387               | centromeric to exon 1 of <i>FUNDC2</i> |
| ECD21451                              | F : ATATGGCTTTGCCTTTGCAT<br>R : TGCAATCCCTTTCTCTGTGG       | 250               | <i>FUNDC2</i> intron 1                 |
| ECD13623                              | F : TTTGAGAGGACAACTAGAGGACT<br>R : TGCTCCACATTAAGTGACCAAT  | 517               | <i>FUNDC2</i> encompasses exon 2       |
| ECD07678                              | F : GGCATATGGCTTCGCATATAG<br>R : TGCAGAACAAAGCAGAGTATGAA   | 676               | <i>FUNDC2</i> encompasses exon 4       |
| ECD07752                              | F : GCAGTTTTTCAACCCACTCC<br>R : ATCTACCGCGACGAATACCA       | 674               | <i>MTCPI</i> exons 2, 3, 4, 5          |
| ECD13141                              | F : TGGAGCTGAGTGAGTGCAAA<br>R : AGGAGCTTACACCAGGCTCA       | 526               | <i>MTCPI</i> intron 1                  |
| ECD15347                              | F : TGTCTCCCCTTAAATGCCAGT<br>R : AAAAAGGAAGTGGGGTTTGG      | 473               | <i>BRCC3</i> intron 2                  |
| ECD20126                              | F : CGGTGGATTATTTCTGGTG<br>R : ACGAGGGCATGAAATCTTGA        | 297               | <i>BRCC3</i> intron 3                  |
| ECD02005                              | F : TTCACCCTTGTCCTTCAAC<br>R : GGAGCTCAGAGGAAAGAACTCA      | 846               | <i>BRCC3</i> intron3                   |
| ECD05774                              | F : GACAACCTGCCACTCAACCA<br>R : CATTGTCGCAGTGTTGACC        | 728               | <i>BRCC3</i> encompasses exon 4        |
| ECD22603                              | F : TTTTCATGCCACTGATGAGG<br>R : TGCCTTTGCAAAAAGTAGGA       | 215               | <i>BRCC3</i> intron 5                  |
| STS1 <sup>a</sup>                     | F: CCTTGGCACGTTTGACAT<br>R: GCTTGGCTGCTGCTACTTTC           | 218               | <i>MTCPI</i> Intron 1                  |
| STS2 <sup>a</sup>                     | F: ATCCGCCTTGAGAACAGCTA<br>R: AACTTCGGTTCGAGTGACCT         | 128               | <i>MTCPI</i> Exon 1                    |
| STS3 <sup>a</sup>                     | F: CGCCGCTCACAGAGTACG<br>R: AGCAGCACCTGGGAAACG             | 155               | <i>MTCPI</i> Exon 1                    |
| STS4 <sup>a</sup>                     | F : TTTGTCTCAACCACGCTCTG<br>R: CCTAAATCGAGGATGCCTGT        | 175               | <i>BRCC3</i> Exon 1/intron 1           |
| STS5 <sup>a</sup>                     | F: GCAAGGCAGGTCAGAAAGAC<br>R: AGGCTCTTCGATACCCTTCA         | 155               | <i>BRCC3</i> Intron 1                  |
| STS6 <sup>a</sup>                     | F:CTGTAAGGATCACATGGCACA<br>R:GGCACTATATCCCATCACCAA         | 228               | <i>MTCPI</i> Intron 1                  |
| STS7 <sup>a</sup>                     | F:AGCGCCCTATGAAGATTGTG<br>R:GGCCTGTGTATGAGTCCTGA           | 194               | <i>MTCPI</i> Intron 1                  |
| STS8 <sup>a</sup>                     | F:CTGCATAACTTGCCAGAACAG<br>R:GGGAGAGGGATTTCAGATCAA         | 166               | <i>MTCPI</i> Intron 1                  |
| <b>Breakpoints sequencing primers</b> |                                                            |                   |                                        |
| PrimerF1 <sup>b</sup>                 | TTTGAGAGGACAACTAGAGGACT                                    |                   |                                        |
| STSR7 <sup>c</sup>                    | GGCCTGTGTATGAGTCCTGA                                       |                   |                                        |

**Table S1. Primers used for walking PCR and breakpoints sequencing**

<sup>a</sup> Walking PCR primers used in family F2 <sup>b</sup> Breakpoints sequencing primers used in family F1 <sup>c</sup> Breakpoints sequencing primers used in families F2 and F3



| <b><i>BRCC3</i></b><br><b>exons</b>   | <b>Primer name</b>                                                                          | <b>primer sequence 5' - 3'</b>                                                                                           | <b>Product size (bp)</b> |
|---------------------------------------|---------------------------------------------------------------------------------------------|--------------------------------------------------------------------------------------------------------------------------|--------------------------|
| 1                                     | BRCC3ex1Fs<br>BRCC3ex1Rs<br>STSR4                                                           | F: GGTCCAGGGAGAGTTGTACG<br>R: CGCACCTTCTGTTAGGCTCT<br>CCTAAATCGAGGATGCCTGT                                               | 1235                     |
| 2                                     | BRCC3F2 <sup>a</sup><br>BRCC3R2                                                             | F:GCCGAAGAGGATGAGGAAAT<br>R:CCCCGGAGTGATAATGGTAA                                                                         | 311                      |
| 3                                     | BRCC3F3 <sup>a</sup><br>BRCC3R3                                                             | F:TTGTGCATGTGTCCCAGATT<br>R:AGAGCAGCAAGAGGGTGGTA                                                                         | 477                      |
| 4                                     | BRCC3F4 <sup>a</sup><br>BRCC3R4                                                             | F:TGAGGTTGGGTGTCTTTTATTG<br>R:GGCATTTAGGAGCAGGAATG                                                                       | 501                      |
| 5                                     | BRCC3F5 <sup>a</sup><br>LR-BRCC3R1                                                          | F:GCATTGGAAACCATGTGGA<br>R:CCTGGACAGTAATGATATTCAGCA                                                                      | 547                      |
| 6                                     | LR-BRCC3F2<br>BRCC3R6<br>BRCC3ex6 <sup>a</sup>                                              | F:CTATTACCACATTCCATAGCAGAGC<br>R:CTTTCCCCAAGAAATCCACA<br>GCCTGTACAATCTGAATCCTAGG                                         | 563                      |
| 7                                     | BRCC3F7 <sup>a</sup><br>BRCC3R7                                                             | F:GCAGATGTTTGGTTGTGACC<br>R:AAAGGAAATGTCAGGCAGGA                                                                         | 497                      |
| 8                                     | BRCC3F8 <sup>a</sup><br>LR-BRCC3R2                                                          | F:CCATCTTGGTGTGTGGTTTC<br>R:GCATTCTCACTTTCCTCCTTGATA                                                                     | 328                      |
| 9 - 10                                | LR-BRCC3F3<br>BRCC3R10<br>BRCC3F10 <sup>a</sup>                                             | F:CTATGGAACTAGGGAATACTGGCTCT<br>R:CCCAGAGTTTACAAGAAATGTTGG<br>AGCTTTGGTGAGAGACAGCA                                       | 1096                     |
| 11                                    | BRCC3F11-2 <sup>a</sup><br>BRCC3R11                                                         | F:CAGGCTTCCCTCTGGCTTAT<br>R:CCTTGCCATTGTACCACTCA                                                                         | 666                      |
| <b><i>MTCPI</i></b><br><b>exons</b>   |                                                                                             |                                                                                                                          |                          |
| 1                                     | STSF1<br>STSR3<br>stSG604434F <sup>a</sup><br>LR-BRCC3F1 <sup>a</sup><br>STSF3 <sup>a</sup> | F:CCTTGGCACGTTTGACAT<br>R:AGCAGCACCTGGGAAACG<br>ATCCGCCTTGAGAACAGCTA<br>GCTGTGAGTTGGAAATAAACAAAAAT<br>CGCCGCTCACAGAGTACG | 857                      |
| 2 - 3 - 4                             | MTCP1F2*<br>MTCP1Rex                                                                        | F:GCAGTCAGCAGCACTACCTG<br>R:CACAACCTGAATAGAGCCAAAACAA                                                                    | 844                      |
| <b><i>MTCP1NB</i></b><br><b>exons</b> |                                                                                             |                                                                                                                          |                          |
| 2                                     | MTCP1NBF<br>MTCP1NBR <sup>a</sup>                                                           | F:AAGGGTTTCTTCTGCGAATG<br>R:TGCTAATCACCTGGAGTGAAAA                                                                       | 598                      |
| 3                                     | MTCPNBF1 <sup>a</sup><br>LR-MTCP1R                                                          | F:TTTCCCTAACGAACCTGTCG<br>R: TGAGTCCTTTCACCTAACATACCTC                                                                   | 682                      |

**Table S2. Primers used for *BRCC3*, *MTCPI*/*MTCP1NB* amplification and sequencing.<sup>a</sup>**  
Sequencing primers

| Probe ID <sup>a</sup> | rs        | position  | Mother<br>F1 II-2 | Affected<br>F1 II-3 | Affected<br>F1 II-4 |
|-----------------------|-----------|-----------|-------------------|---------------------|---------------------|
| CN_404039             |           | 153899986 | 2                 | 1                   | 1                   |
| CN_923663             |           | 153903800 | 2                 | 1                   | 1                   |
| CN_923664             |           | 153904537 | 2                 | 1                   | 1                   |
| <b>CN_923665</b>      |           | 153913201 | 2                 | 1                   | 1                   |
| CN_923667             |           | 153921900 | 1                 | 0                   | 0                   |
| CN_923668             |           | 153924357 | 1                 | 0                   | 0                   |
| CN_923670             |           | 153928244 | 1                 | 0                   | 0                   |
| SNP_A-<br>4304694     | rs1448032 | 153933999 | 1                 | 0                   | 0                   |
| SNP_A-<br>1868149     | rs2051161 | 153939045 | 1                 | 0                   | 0                   |
| CN_404047             |           | 153942523 | 1                 | 0                   | 0                   |
| CN_923672             |           | 153943426 | 1                 | 0                   | 0                   |
| CN_923673             |           | 153947727 | 1                 | 0                   | 0                   |
| CN_923674             |           | 153949766 | 1                 | 0                   | 0                   |
| <b>CN_923676</b>      |           | 153959531 | 2                 | 1                   | 1                   |
| SNP_A-<br>8311882     | rs5945287 | 153967224 | 2                 | 1                   | 1                   |
| CN_923679             |           | 153967285 | 2                 | 1                   | 1                   |
| CN_923681             |           | 153971361 | 2                 | 1                   | 1                   |

**Table S3 : Affymetrix SNP 6.0 array data suggesting an Xq28 deletion in family F1: <sup>a</sup>**

Copy number states of the SNP and copy number probes with their respective positions are shown. Physical probe positions refer to NCBI built 36.3. The GTC v 4.0 software was used to estimate the relative likelihood of each copy number level to be 0, 1, 2, 3 or 4. In the region bracketed by the probes CN-923665 and CN\_923676 the copy number level in the obligatory carrier mother (F1 I-2) is estimated at 1 and in her two affected sons (F1 II-3 and F1 II-4) at 0, indicating the loss of genetic material.

#### Supplemental References

38. Shaner, N.C., Campbell, R.E., Steinbach, P.A., Giepmans, B.N., Palmer, A.E., and Tsien, R.Y. (2004). Improved monomeric red, orange and yellow fluorescent proteins derived from *Discosoma* sp. red fluorescent protein. *Nat. Biotechnol.* 22, 1567–1572.
39. Szymczak, A.L., and Vignali, D.A. (2005). Development of 2A peptide-based strategies in the design of multicistronic vectors. *Expert Opin. Biol. Ther.* 5, 627–638.
40. Kwan, K.M., Fujimoto, E., Grabher, C., Mangum, B.D., Hardy, M.E., Campbell, D.S., Parant, J.M., Yost, H.J., Kanki, J.P., and Chien, C.B. (2007). The Tol2kit: A multisite gateway-based construction kit for Tol2 transposon transgenesis constructs. *Dev. Dyn.* 236, 3088–3099.
